# Supplementary material for: Identification of Cancer Hallmarks Based on the Gene Co-expression Networks of Seven Cancers
Source: Front Genet. 2019 Feb 19;10:99. doi: 10.3389/fgene.2019.00099 (PMC6389798; doi:10.3389/fgene.2019.00099)
Supplement: Supplementary file 10 [file Table_10.xlsx]

## Sheet: Sheet1
Table S10. All the genes in hallmark 'Mitotic cell cycle'
Entrez Gene Id	Gene Symbol	Gene Description
5347	PLK1	polo-like kinase 1
1063	CENPF	centromere protein F, 350/400kDa (mitosin)
9700	ESPL1	extra spindle pole bodies homolog 1 (S. cerevisiae)
9212	AURKB	aurora kinase B
995	CDC25C	cell division cycle 25 homolog C (S. pombe)
899	CCNF	cyclin F
991	CDC20	cell division cycle 20 homolog (S. cerevisiae)
84722	PSRC1	proline/serine-rich coiled-coil 1
9493	KIF23	kinesin family member 23
10615	SPAG5	sperm associated antigen 5
11113	CIT	citron (rho-interacting, serine/threonine kinase 21)
6597	SMARCA4	SWI/SNF related, matrix associated, actin dependent regulator of chromatin, subfamily a, member 4
641	BLM	Bloom syndrome, RecQ helicase-like
1869	E2F1	E2F transcription factor 1
90381	C15orf42	chromosome 15 open reading frame 42
55215	FANCI	Fanconi anemia, complementation group I
2305	FOXM1	forkhead box M1
9055	PRC1	protein regulator of cytokinesis 1
83461	CDCA3	cell division cycle associated 3
10112	KIF20A	kinesin family member 20A
4173	MCM4	minichromosome maintenance complex component 4
1785	DNM2	dynamin 2
3161	HMMR	hyaluronan-mediated motility receptor (RHAMM)
11180	WDR6	WD repeat domain 6
11140	CDC37	cell division cycle 37 homolog (S. cerevisiae)
1786	DNMT1	DNA (cytosine-5-)-methyltransferase 1
51780	KDM3B	lysine (K)-specific demethylase 3B
10721	POLQ	polymerase (DNA directed), theta
5428	POLG	polymerase (DNA directed), gamma
1495	CTNNA1	catenin (cadherin-associated protein), alpha 1, 102kDa
11188	NISCH	nischarin
9817	KEAP1	kelch-like ECH-associated protein 1
3609	ILF3	interleukin enhancer binding factor 3, 90kDa
83463	MXD3	MAX dimerization protein 3
6843	VAMP1	vesicle-associated membrane protein 1 (synaptobrevin 1)
22907	DHX30	DEAH (Asp-Glu-Ala-His) box polypeptide 30
57572	DOCK6	dedicator of cytokinesis 6
5589	PRKCSH	protein kinase C substrate 80K-H
7167	TPI1	triosephosphate isomerase 1
57153	SLC44A2	solute carrier family 44, member 2
23438	HARS2	histidyl-tRNA synthetase 2, mitochondrial (putative)
81890	QTRT1	queuine tRNA-ribosyltransferase 1
6627	SNRPA1	small nuclear ribonucleoprotein polypeptide A'
3550	IK	IK cytokine, down-regulator of HLA II
115950	ZNF653	zinc finger protein 653
125931	CEACAM20	carcinoembryonic antigen-related cell adhesion molecule 20
284992	CCDC150	coiled-coil domain containing 150
343099	CCDC18	coiled-coil domain containing 18
51307	FAM53C	family with sequence similarity 53, member C
51385	ZNF589	zinc finger protein 589
65095	KRI1	KRI1 homolog (S. cerevisiae)
