# Supplementary material for: Identification of Cancer Hallmarks Based on the Gene Co-expression Networks of Seven Cancers
Source: Front Genet. 2019 Feb 19;10:99. doi: 10.3389/fgene.2019.00099 (PMC6389798; doi:10.3389/fgene.2019.00099)
Supplement: Supplementary file 11 [file Table_11.xlsx]

## Sheet: Sheet1
Table S11. All the genes in hallmark 'RNA processing'
Entrez Gene Id	Gene Symbol	Gene Description
10785	WDR4	WD repeat domain 4
339175	METTL2A	methyltransferase like 2A
55798	METTL2B	methyltransferase like 2B
8563	THOC5	THO complex 5
10181	RBM5	RNA binding motif protein 5
58517	RBM25	RNA binding motif protein 25
3185	HNRNPF	heterogeneous nuclear ribonucleoprotein F
84844	PHF5A	PHD finger protein 5A
23076	RRP1B	ribosomal RNA processing 1 homolog B (S. cerevisiae)
196441	ZFC3H1	zinc finger, C3H1-type containing
79665	DHX40	DEAH (Asp-Glu-Ala-His) box polypeptide 40
9463	PICK1	protein interacting with PRKCA 1
23067	SETD1B	SET domain containing 1B
54093	SETD4	SET domain containing 4
63977	PRDM15	PR domain containing 15
5894	RAF1	v-raf-1 murine leukemia viral oncogene homolog 1
81929	SEH1L	SEH1-like (S. cerevisiae)
1375	CPT1B	carnitine palmitoyltransferase 1B (muscle)
65258	MPPE1	metallophosphoesterase 1
51332	SPTBN5	spectrin, beta, non-erythrocytic 5
25777	SUN2	Sad1 and UNC84 domain containing 2
6249	CLIP1	CAP-GLY domain containing linker protein 1
85377	MICALL1	MICAL-like 1
22906	TRAK1	trafficking protein, kinesin binding 1
10043	TOM1	target of myb1 (chicken)
162	AP1B1	adaptor-related protein complex 1, beta 1 subunit
10513	APPBP2	amyloid beta precursor protein (cytoplasmic tail) binding protein 2
57519	STARD9	StAR-related lipid transfer (START) domain containing 9
10478	SLC25A17	solute carrier family 25 (mitochondrial carrier; peroxisomal membrane protein, 34kDa), member 17
6928	HNF1B	HNF1 homeobox B
8620	NPFF	neuropeptide FF-amide peptide precursor
1859	DYRK1A	dual-specificity tyrosine-(Y)-phosphorylation regulated kinase 1A
10110	SGK2	serum/glucocorticoid regulated kinase 2
25930	PTPN23	protein tyrosine phosphatase, non-receptor type 23
8526	DGKE	diacylglycerol kinase, epsilon 64kDa
161247	FITM1	fat storage-inducing transmembrane protein 1
5771	PTPN2	protein tyrosine phosphatase, non-receptor type 2
4731	NDUFV3	NADH dehydrogenase (ubiquinone) flavoprotein 3, 10kDa
25989	ULK3	unc-51-like kinase 3 (C. elegans)
8566	PDXK	pyridoxal (pyridoxine, vitamin B6) kinase
6305	SBF1	SET binding factor 1
51559	NT5DC3	5'-nucleotidase domain containing 3
5905	RANGAP1	Ran GTPase activating protein 1
10474	TADA3	transcriptional adaptor 3
23774	BRD1	bromodomain containing 1
7327	UBE2G2	ubiquitin-conjugating enzyme E2G 2
84129	ACAD11	acyl-CoA dehydrogenase family, member 11
1555	CYP2B6	cytochrome P450, family 2, subfamily B, polypeptide 6
283450	C12orf51	chromosome 12 open reading frame 51
9098	USP6	ubiquitin specific peptidase 6 (Tre-2 oncogene)
84669	USP32	ubiquitin specific peptidase 32
7267	TTC3	tetratricopeptide repeat domain 3
875	CBS	cystathionine-beta-synthase
25942	SIN3A	SIN3 homolog A, transcription regulator (yeast)
9612	NCOR2	nuclear receptor corepressor 2
56984	PSMG2	proteasome (prosome, macropain) assembly chaperone 2
9929	JOSD1	Josephin domain containing 1
79959	CEP76	centrosomal protein 76kDa
29990	PILRB	paired immunoglobin-like type 2 receptor beta
79631	EFTUD1	elongation factor Tu GTP binding domain containing 1
25814	ATXN10	ataxin 10
8940	TOP3B	topoisomerase (DNA) III beta
8718	TNFRSF25	tumor necrosis factor receptor superfamily, member 25
83714	NRIP2	nuclear receptor interacting protein 2
22877	MLXIP	MLX interacting protein
7541	ZFP161	zinc finger protein 161 homolog (mouse)
23389	MED13L	mediator complex subunit 13-like
9889	ZBED4	zinc finger, BED-type containing 4
84164	ASCC2	activating signal cointegrator 1 complex subunit 2
22909	FAN1	FANCD2/FANCI-associated nuclease 1
79957	PAQR6	progestin and adipoQ receptor family member VI
1476	CSTB	cystatin B (stefin B)
23654	PLXNB2	plexin B2
81033	KCNH6	potassium voltage-gated channel, subfamily H (eag-related), member 6
1241	LTB4R	leukotriene B4 receptor
9058	SLC13A2	solute carrier family 13 (sodium-dependent dicarboxylate transporter), member 2
8505	PARG	poly (ADP-ribose) glycohydrolase
23151	GRAMD4	GRAM domain containing 4
1014	CDH16	cadherin 16, KSP-cadherin
55814	BDP1	B double prime 1, subunit of RNA polymerase III transcription initiation factor IIIB
144106	ST13P5	suppression of tumorigenicity 13 (colon carcinoma) (Hsp70 interacting protein) pseudogene 5
162632	LOC162632	ubiquitin specific peptidase 6 (Tre-2 oncogene) pseudogene
172	AFG3L1P	AFG3 ATPase family gene 3-like 1 (S. cerevisiae), pseudogene
2130	EWSR1	Ewing sarcoma breakpoint region 1
22889	KIAA0907	KIAA0907
267004	PGBD3	piggyBac transposable element derived 3
440295	GOLGA6L9	golgin A6 family-like 9
440350	NPIPL1	nuclear pore complex interacting protein-like 1
49855	SCAPER	S-phase cyclin A-associated protein in the ER
51136	RNFT1	ring finger protein, transmembrane 1
54581	SCAND2	SCAN domain containing 2 pseudogene
56965	PARP6	poly (ADP-ribose) polymerase family, member 6
653319	KIAA0895L	KIAA0895-like
79844	ZDHHC11	zinc finger, DHHC-type containing 11
80022	MYO15B	myosin XVB pseudogene
80212	CCDC92	coiled-coil domain containing 92
81698	C15orf5	chromosome 15 open reading frame 5
85395	FAM207A	family with sequence similarity 207, member A
8552	INE1	inactivation escape 1 (non-protein coding)
9686	VGLL4	vestigial like 4 (Drosophila)
9701	PPP6R2	protein phosphatase 6, regulatory subunit 2
