# Supplementary material for: Identification of Cancer Hallmarks Based on the Gene Co-expression Networks of Seven Cancers
Source: Front Genet. 2019 Feb 19;10:99. doi: 10.3389/fgene.2019.00099 (PMC6389798; doi:10.3389/fgene.2019.00099)
Supplement: Supplementary file 13 [file Table_13.xlsx]

## Sheet: Sheet1
Table S13. The drugs screened by Hallmark 'RNA processing'
Rank	Drug name	P-value	Tag
1	PYRIDOXINE	0.000201003	UNCLEAR
2	BIOMED 101	0.0058381	TRUE
3	LY293111	0.0058381	TRUE
4	LY-293111	0.0058381	TRUE
5	AMELUBANT	0.0058381	TRUE
6	LTB 019	0.0058381	UNCLEAR
7	ICO-007	0.0058381	TRUE
8	ISIS 5132	0.0058381	TRUE
9	BIFONAZOLE	0.0058381	UNCLEAR
10	STAVUDINE	0.0058381	UNCLEAR
11	LERAFAON	0.0058381	TRUE
12	U 75302	0.0058381	UNCLEAR
13	LY-210073	0.0058381	UNCLEAR
14	RG-14893	0.0058381	UNCLEAR
15	RP-66153	0.0058381	UNCLEAR
16	CI-949	0.0058381	UNCLEAR
17	LY-223982	0.0058381	UNCLEAR
18	LY-255283	0.0058381	UNCLEAR
19	SC-53228	0.0058381	UNCLEAR
20	LTB4	0.0058381	UNCLEAR
21	SPN-803	0.0058381	UNCLEAR
22	MIQ-001	0.0058381	UNCLEAR
23	ETOMOXIR	0.0058381	UNCLEAR
24	RO-5126766	0.0058381	TRUE
25	LY3009120	0.0058381	TRUE
26	MLN2480	0.0058381	TRUE
27	CKI-27	0.0058381	TRUE
28	RG7304	0.0058381	TRUE
29	SB-209247	0.0058381	UNCLEAR
30	SB-201993	0.0058381	UNCLEAR
31	DW-1350	0.0058381	TRUE
32	CP-195543	0.0116425	UNCLEAR
33	TICLOPIDINE	0.0116425	UNCLEAR
34	VEMURAFENIB	0.0116425	TRUE
35	LAMIVUDINE	0.0116425	TRUE
36	SELEGILINE	0.0174132	UNCLEAR
37	CHIR-265	0.0174132	TRUE
38	RAF265	0.0174132	TRUE
39	DOXORUBICINOL	0.0174132	TRUE
40	XL281	0.0174132	TRUE
41	LGX818	0.0174132	TRUE
42	1096708-71-2	0.0174132	TRUE
43	MEPHENYTOIN	0.0174132	TRUE
44	THIOTEPA	0.0231506	TRUE
45	ARTEMISININ	0.0231506	UNCLEAR
46	CLOPIDOGREL	0.0231506	TRUE
47	DOXORUBICIN	0.026095	TRUE
48	IFOSFAMIDE	0.0288549	TRUE
49	ETHINYL ESTRADIOL	0.0288549	TRUE
50	SEMAPIMOD	0.0288549	UNCLEAR
51	TERAZOSIN	0.0345261	UNCLEAR
52	DOXAZOSIN	0.0345261	UNCLEAR
53	DABRAFENIB	0.0345261	TRUE
54	RIFAMPIN	0.0401646	TRUE
55	3,4-METHYLENEDIOXYMETHAMPHETAMINE	0.0457704	TRUE
56	L-SERINE	0.0457704	UNCLEAR
57	KETAMINE	0.0457704	TRUE
P-values of the drugs were screened by hypergeometric distribution test. In the column of 'Tag', a drug was set as 'TRUE' if its adaptation diseases include 'neoplasm', otherwise, it was set as 'UNCLEAR'.
